# Supplementary material for: Draft Genome Assembly and Transcriptome Dataset for European Turnip (Brassica rapa L. ssp. rapifera), ECD4 Carrying Clubroot Resistance
Source: PubMed Central journal article supplement (PMC8285094; doi:10.3389/fgene.2021.651298), 2021-07-02
Supplement: Data_Sheet_1.pdf [file Data_Sheet_1.pdf]

## Supplementary Material

### Supplementary figures

**Figure S1. Dot plot analysis between genomes of European turnip and Chinese cabbage.** In the dot plot, the *x*- and *y*-axes indicate positions in the contigs of European turnip and the corresponding aligned genomic regions of Chinese cabbage, respectively.

**Figure S2. Functional protein domains enriched in the European turnip-specific orthologous gene cluster.** Functional protein domains of genes belonging to the European turnip-specific orthologous gene cluster were searched using InterProScan. Enrichment of Pfam domains was analysed by using DAVID with a cutoff EASE score  $<1E-03$ .

**Figure S3. Functional protein domains enriched in expanded gene families within the genome of European turnip.** Functional protein domains were identified by a Pfam search, and domain enrichments were analysed by the *Z*-test ( $p$ -value  $<0.001$ ). The heatmap shows the relative abundance (*Z*-score) of functional domains across six plant genomes: European turnip (*B. rapa* ssp. *rafifera*), Chinese cabbage (*B. rapa* ssp. *pekinensis*), *B. oleracea*, *B. nigra*, *Raphanus sativus*, and *Arabidopsis thaliana*.

**Figure S4. Functional enrichment for genes showing tissue-specific expression.** RNA-Seq data derived from inner leaf, outer leaf, main root, and lateral root tissues were analysed by using DESeq2 with a cutoff of  $q < 0.05$ , absolute  $\geq 2$ -fold change, and at least one tissue  $\geq 10$  FPKMs. Functional annotation for genes showing tissue-specific expression was performed by using DAVID with a cutoff EASE score  $<1E-04$ .

**Figure S5. Prediction of membrane-associated resistance genes in the genome of European turnip.** RGAs, such as RLKs and receptor-like proteins (RLPs), were predicted using an RGAugury pipeline. A total of 1,135 genes—119 RLPs, 742 RLKs, and 274 TM-CCs—were identified.

**Figure S6. Comparison between genomic regions linked to *BraA.CR.a* and *BraA.CR.b* loci in European turnip and their counterparts in Chinese cabbage.**

**Figure S7. Identification of genome rearrangements between European turnip (ET) and other *B. rapa* subspecies including Chinese cabbage (CC) (v3), pak choi (PC) (Li et al., 2020), and yellow sarson (YS) (Belser et al., 2018).** Comparisons: (A) CC vs. ET (presented in Fig. 1B), (B) CC vs. PC, (C) CC vs. YS, (D) PC vs. ET, and (E) YS vs. ET.

**Figure S8. Validation of genome rearrangements between European turnip and Chinese cabbage.** (A) The strategy for detecting genome rearrangements based on Illumina paired-end read mapping. For example, paired-end reads of European turnip, which were properly mapped to a 600-kb region in its contig00007136, were mapped to 18.243-Mb region for one side and 19.583-Mb regions for other side in A10 of Chinese cabbage, respectively, showing the collapse of paired-end read mapping in the genome of Chinese cabbage. (B and C) The visualization of read mapping in a hotspot using IGV (<https://software.broadinstitute.org/software/igv/>).

**Figure S9. Orthologous gene clusters among *B. rapa* subspecies sequenced (A) and functional annotation for species-specific genes in three subspecies (B).** (A) Orthologous gene clusters among Chinese cabbage (v3), European turnip, and yellow sarson (Belser et al., 2018) were analyzed by using OrthoMCL. (B) Functional protein domains of genes belonging to subspecies-specific orthologous gene cluster were searched using InterProscan. Enrichment of InterPro domains was analyzed by using DAVID with the cutoff of EASE score  $< 1E-02$ .

**Figure S10. Procedure of genome assembly for European turnip.** In procedure, the yield of generated and filtrated data is summarized for each of steps.

## Supplementary tables

**Table S1. Summary for whole-genome sequencing data of European turnip**

**Table S2. Anchoring contigs of European turnip to the genome of Chinese cabbage**

**Table S3. Assessment of the genome assembly of European turnip using Benchmarking Universal Single-Copy Orthologues (BUSCOs)**

**Table S4. Identification of genome rearrangements between European turnip and Chinese cabbage**

**Table S5. Abundance of transposable elements (TEs) identified in the genome of European turnip**

**Table S6. Summary of RNA-Seq of different tissues of European turnip**

**Table S7. Identification of plant *R* genes in the genome of European turnip**

**Table S8. Mapping of microsatellite markers linked to clubroot resistance loci to the draft assembly of European turnip**

**Table S9. List of *R* genes within conserved blocks that are linked to clubroot resistance loci.**

**Table S10. BUSCO scores with multiple rounds of error correction in Pilon.**

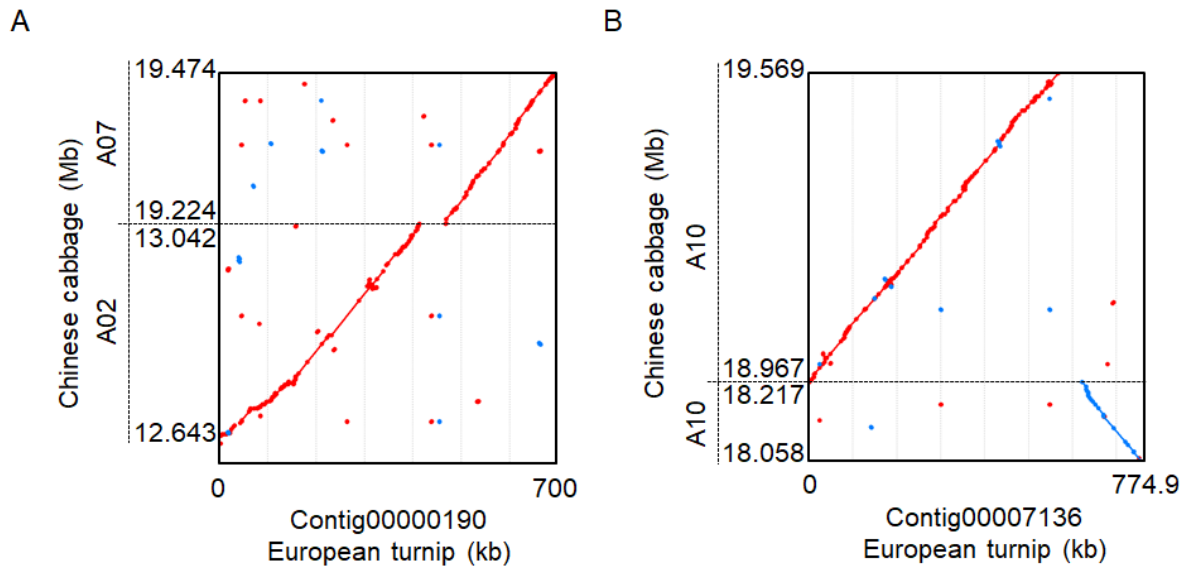

**Figure S1. Dot plot analysis between genomes of European turnip and Chinese cabbage.** In dot plot, *x*- and *y*-axes indicate positions in contig of European turnip and the corresponding aligned genomic regions of Chinese cabbage, respectively.

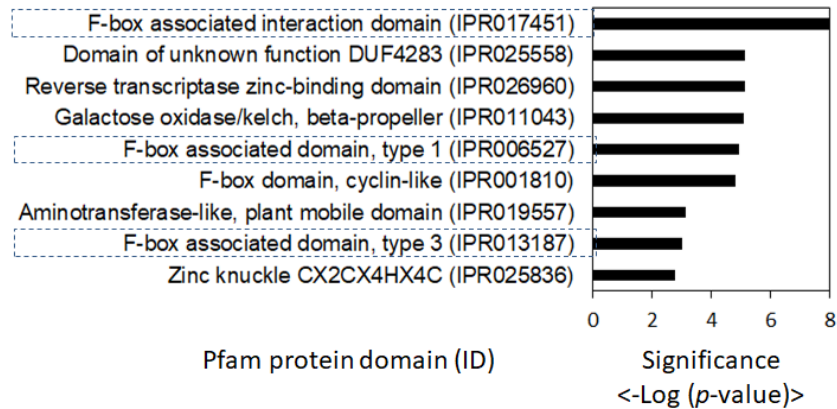

**Figure S2. Functional protein domains enriched in European turnip-specific orthologous gene cluster.** Functional protein domains of genes belonging to European turnip-specific orthologous gene cluster were searched using InterProscan. Enrichment of Pfam domains was analyzed by using DAVID with the cutoff of EASE score  $< 1E-03$ .

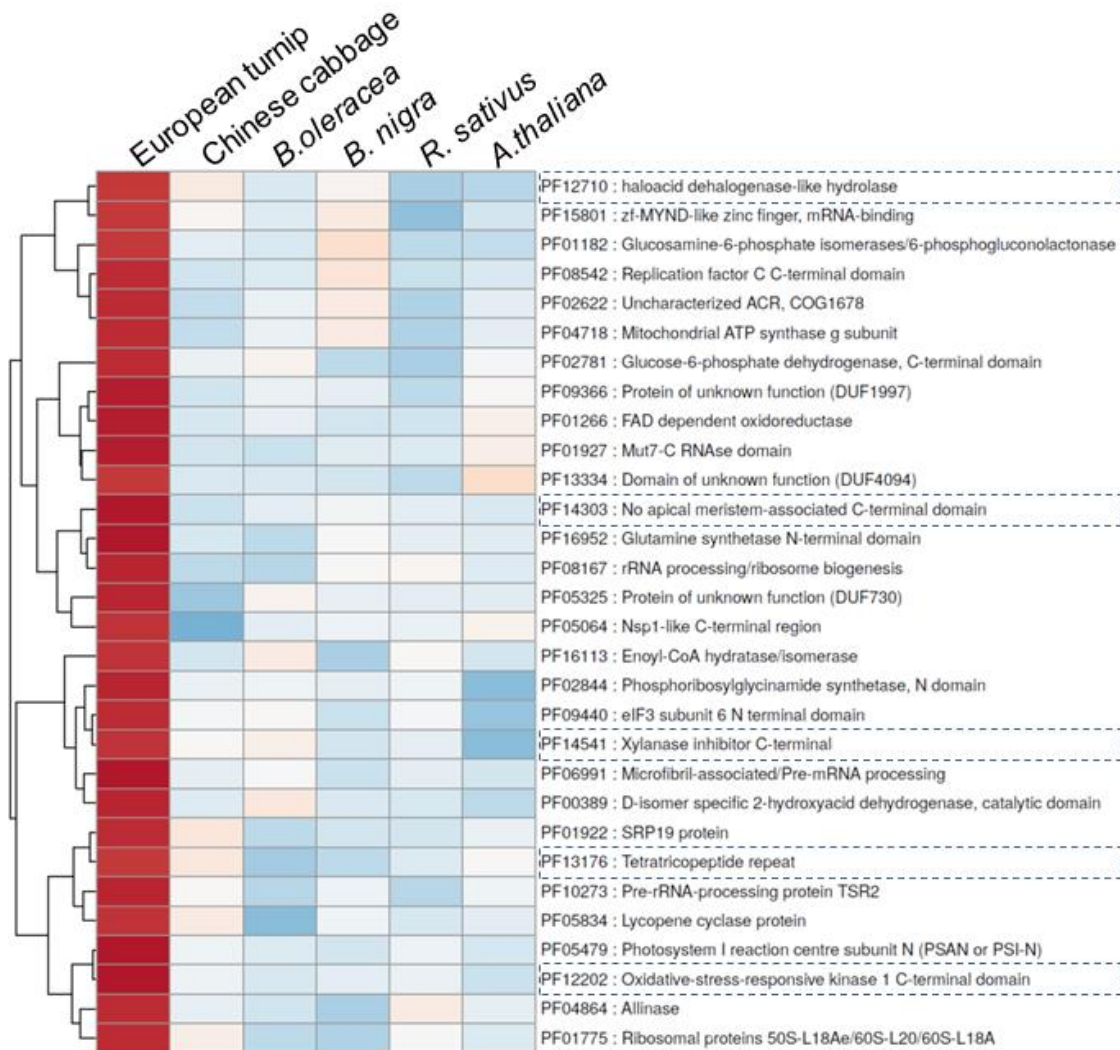

**Figure S3. Functional protein domains enriched in expanded gene families within the genome of European turnip.** Functional protein domains were identified by Pfam search and domain enrichments were analyzed by the Z-test ( $p$ -value < 0.001). The heatmap shows the relative abundance (Z-score) of functional domains across six plant genomes, including European turnip (*B. rapa* ssp. *rafifera*), Chinese cabbage (*B. rapa* ssp. *pekinensis*), *B. oleracea*, *B. nigra*, *Raphanus sativus*, and *Arabidopsis thaliana*.

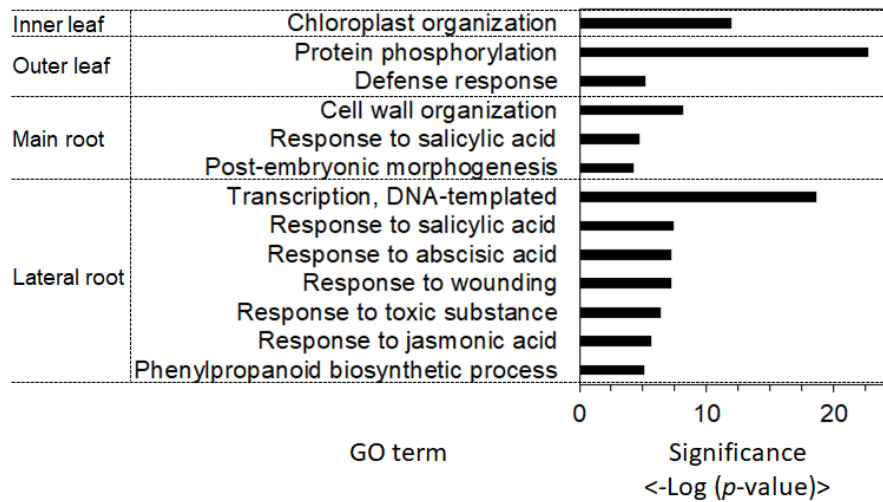

**Figure S4. Functional enrichment for genes showing tissue-specific expressions.** RNA-Seq data derived from inner leaf, outer leaf, main root, and later root tissues were analyzed by using DESeq2 with the cutoff of  $q < 0.05$ , absolute  $\geq 2$ -fold change, and at least one tissue  $\geq 10$  FPKMs. Functional annotation for genes showing tissue-specific expressions was performed by using DAVID with the cutoff of EASE score  $< 1E-04$ .

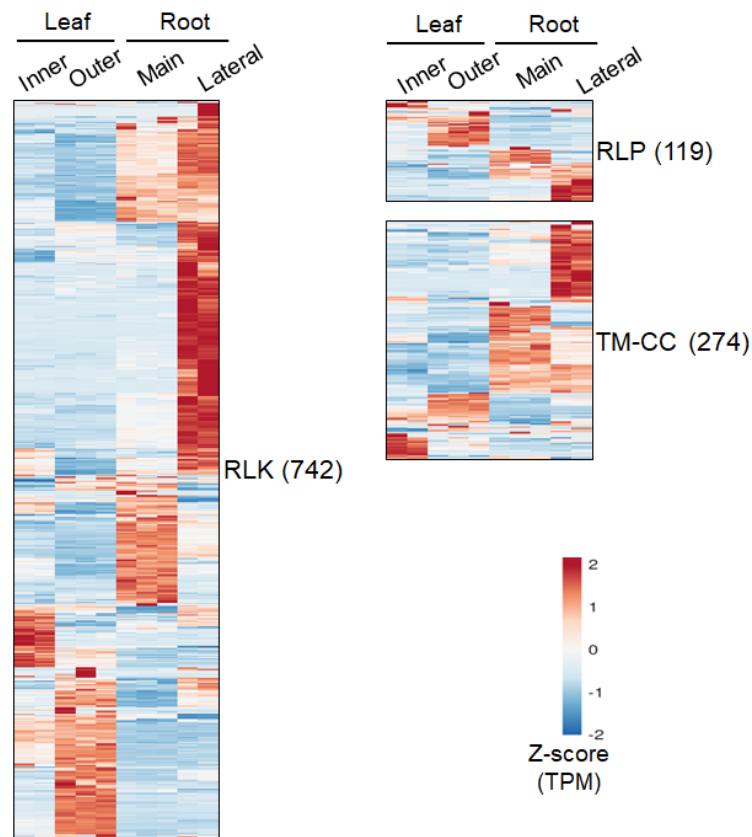

**Figure S5. Prediction of membrane-associated resistance genes in the genome of European turnip.** The resistance gene analogs (RGAs), such as receptor-like protein kinases (RLKs) and receptor-like proteins (RLPs), were predicted using a RGAugury pipeline. A total of 1,135 genes, including 119 receptor-like proteins (RLPs), 742 receptor-like kinases (RLKs), and 274 TM-CCs, were identified.

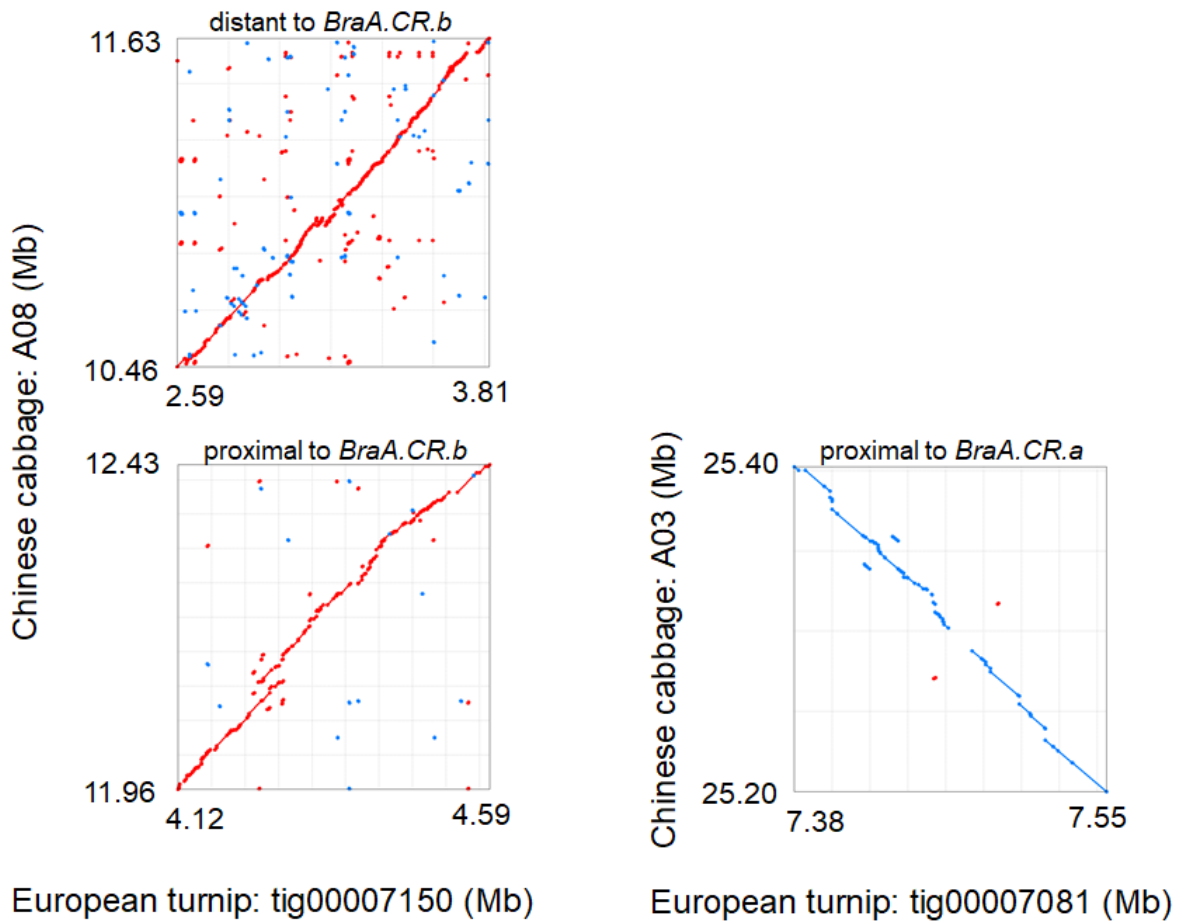

**Figure S6. Comparison between genomic regions linked to *BraA.CR.a* and *BraA.CR.b* loci in European turnip and the counterparts in Chinese cabbage.**



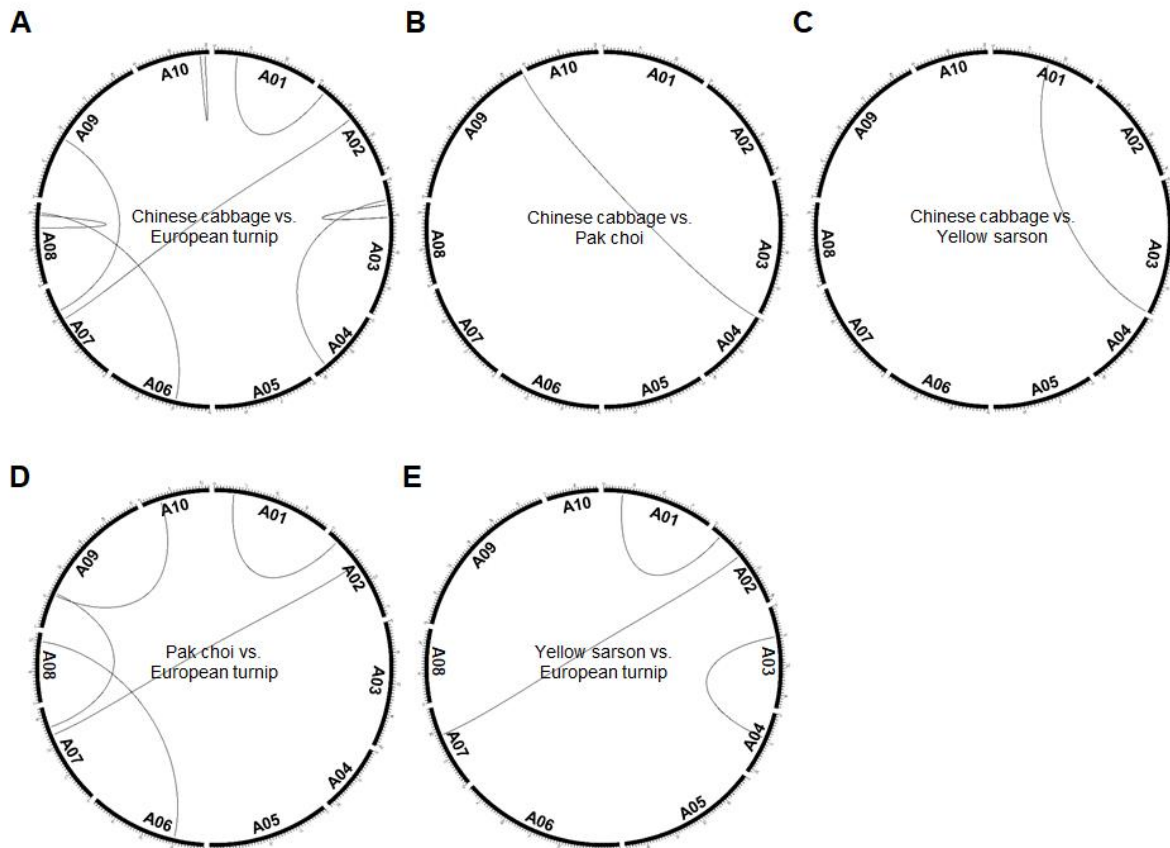

**Figure S7. Identification of genome rearrangements between European turnip (ET) and other *B. rapa* subspecies including Chinese cabbage (CC) (v3), pak choi (PC) (Li et al., 2020), and yellow sarson (YS) (Belser et al., 2018). Comparisons: (A) CC vs. ET (presented in Fig. 1B), (B) CC vs. PC, (C) CC vs. YS, (D) PC vs. ET, and (E) YS vs. ET.**

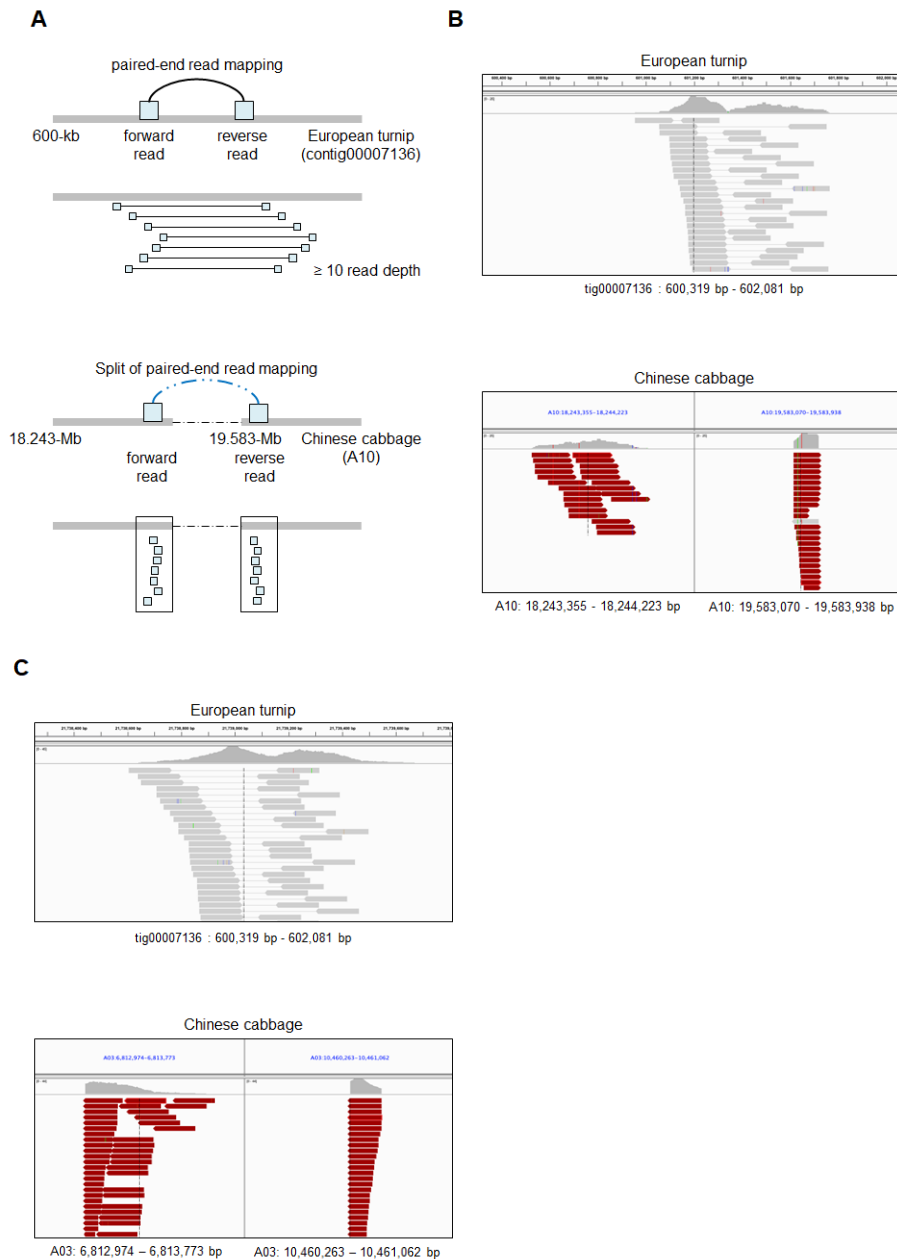

**Figure S8. Validation of genome rearrangements between European turnip and Chinese cabbage.** (A) The strategy for detecting genome rearrangements based on Illumina paired-end read mapping. For example, paired-end reads of European turnip, which were properly mapped to a 600-kb region in its contig00007136, were mapped to 18.243-Mb region for one side and 19.583-Mb regions for other side in A10 of Chinese cabbage, respectively, showing the collapse of paired-end read mapping in the genome of Chinese cabbage. (B and C) The visualization of read mapping in a hotspot using IGV (<https://software.broadinstitute.org/software/igv/>).

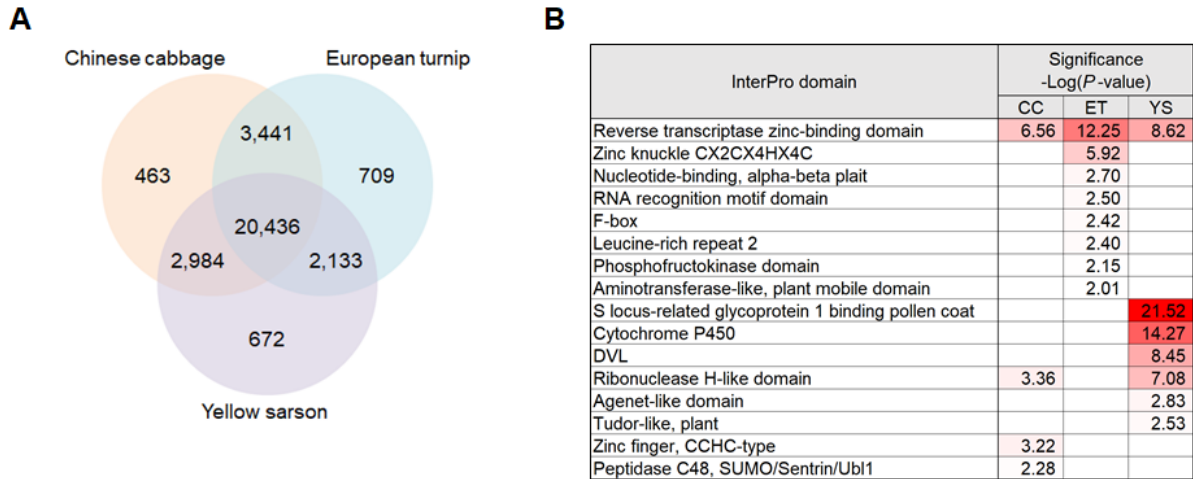

**Figure S9. Orthologous gene clusters among *B. rapa* subspecies sequenced (A) and functional annotation for species-specific genes in three subspecies (B).** (A) Orthologous gene clusters among Chinese cabbage (v3), European turnip, and yellow sarson (Belser et al., 2018) were analyzed by using OrthoMCL. (B) Functional protein domains of genes belonging to subspecies-specific orthologous gene cluster were searched using InterProscan. Enrichment of InterPro domains was analyzed by using DAVID with the cutoff of EASE score  $< 1E-02$ .

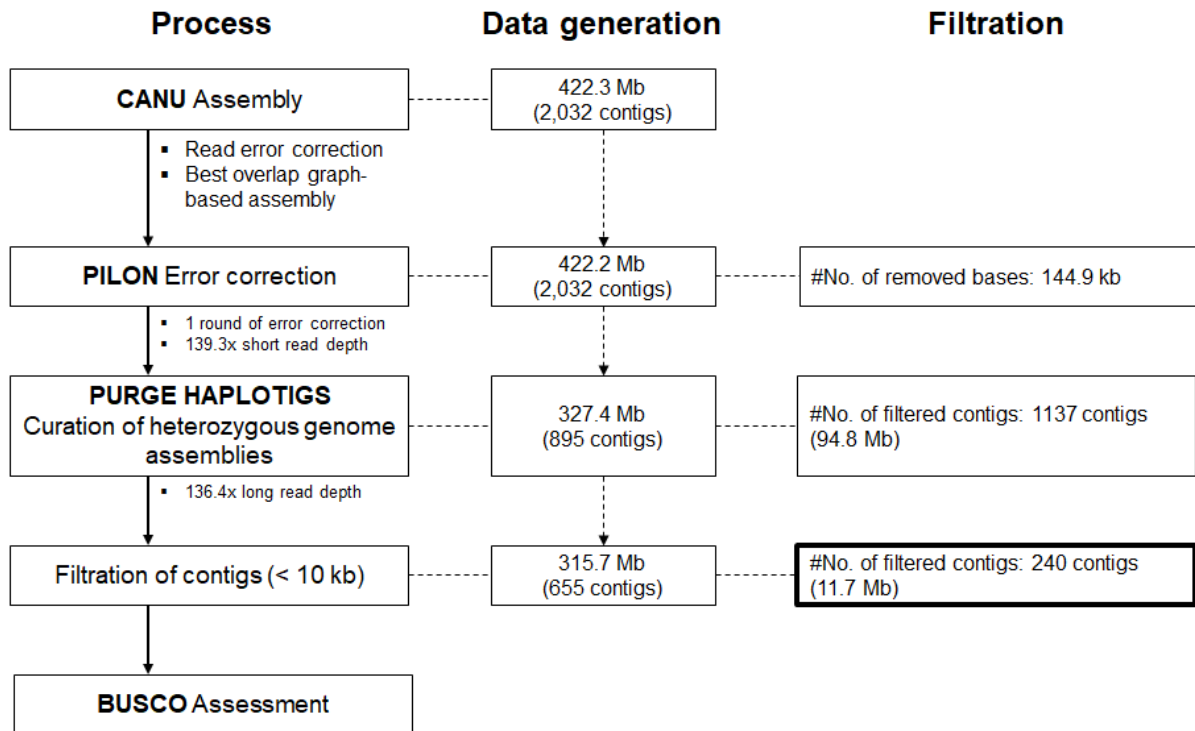

**Figure S10. Procedure of genome assembly for European turnip.** In procedure, the yield of generated and filtrated data is summarized for each of steps.

**Table S1. Summary for whole-genome sequencing data of European turnip.**

| Sequencing (Platform)                         | Read length (bp) | No. of reads | Total bases (Gb) (Sequencing depth, x) |
|-----------------------------------------------|------------------|--------------|----------------------------------------|
| Long read sequencing (PacBio)                 | 10,578           | 6,677,347    | 70.63 (136.4x)                         |
| Short-insert paired-end sequencing (Illumina) | 100              | 477,856,020  | 72.16 (139.3x)                         |

**Table S2. Anchoring contigs of European turnip to the genome of Chinese cabbage.**

| Chromosome<br>of Chinese cabbage | Total length of conserved blocks (Mb) |                    |                                    |
|----------------------------------|---------------------------------------|--------------------|------------------------------------|
|                                  | in Chinese cabbage                    | in European turnip | Coverage (%) in<br>Chinese cabbage |
| A01                              | 29.60                                 | 24.12              | 81.50%                             |
| A02                              | 31.44                                 | 27.30              | 86.84%                             |
| A03                              | 38.15                                 | 36.20              | 94.87%                             |
| A04                              | 21.93                                 | 20.73              | 94.53%                             |
| A05                              | 28.49                                 | 21.95              | 77.02%                             |
| A06                              | 29.17                                 | 23.35              | 80.07%                             |
| A07                              | 28.93                                 | 26.31              | 90.94%                             |
| A08                              | 22.98                                 | 20.93              | 91.07%                             |
| A09                              | 45.16                                 | 41.24              | 91.32%                             |
| A10                              | 20.73                                 | 18.35              | 88.55%                             |
| <b>Total</b>                     | <b>296.58</b>                         | <b>260.48</b>      | <b>87.83%</b>                      |

**Table S3. Assessment of the genome assembly of European turnip using Benchmarking Universal Single-Copy Orthologs (BUSCO).**

| Type                            | European turnip | Chinese cabbage |
|---------------------------------|-----------------|-----------------|
| Complete BUSCOs                 | 423 (99.6%)     | 423 (99.6%)     |
| Complete and single-copy BUSCOs | 350 (82.4%)     | 359 (84.5%)     |
| Complete and duplicated BUSCOs  | 73 (17.2%)      | 64 (15.1%)      |
| Fragmented BUSCOs               | 1 (0.2%)        | 1 (0.2%)        |
| Missing BUSCOs                  | 1 (0.2%)        | 1 (0.2%)        |

**Table S4. Identification of genome rearrangements between European turnip and Chinese cabbage.**

| No. of hotspot | Chinese cabbage (CC) |          |          | European turnip (ET) |          |          | No. of conserved fragment | No. of genes in block |       |
|----------------|----------------------|----------|----------|----------------------|----------|----------|---------------------------|-----------------------|-------|
|                | Aligned region (kb)  |          |          | Aligned region (kb)  |          |          |                           | CC                    | ET    |
|                | Chr.                 | Start    | End      | #Contig              | Start    | End      |                           |                       |       |
| 1              | A02                  | 12,643.5 | 13,041.7 | contig00000190       | 17.7     | 434.3    | 12                        | 73                    | 65    |
|                | A07                  | 19,223.8 | 19,473.9 |                      | 481.8    | 719.9    | 8                         | 53                    | 59    |
| 2              | A01                  | 6,541.1  | 6,800.9  | contig00000704       | 1,385.8  | 1,659.0  | 8                         | 43                    | 51    |
|                | A02                  | 2,493.5  | 3,814.5  |                      | 17.9     | 1,363.2  | 51                        | 288                   | 257   |
| 3              | A03                  | 6,833.3  | 7,011.5  | contig00007081       | 21,756.4 | 21,912.6 | 7                         | 39                    | 36    |
|                | A03                  | 10,470.3 | 32,568.3 |                      | 14.9     | 21,730.4 | 738                       | 3,937                 | 4,083 |
| 4              | A03                  | 5,575.4  | 9,883.2  | contig00007082       | 7.6      | 2,433.7  | 69                        | 786                   | 471   |
|                | A04                  | 9,474.5  | 17,996.1 |                      | 2,472.3  | 10,942.3 | 305                       | 1,302                 | 1,376 |
| 5              | A10                  | 18,057.7 | 18,217.2 | contig00007136       | 629.5    | 774.9    | 7                         | 40                    | 40    |
|                | A10                  | 18,966.7 | 19,568.7 |                      | 11.5     | 579.4    | 21                        | 149                   | 147   |
| 6              | A06                  | 9,650.1  | 9,822.0  | contig00007935       | 81.3     | 290.0    | 9                         | 22                    | 32    |
|                | A08                  | 20,065.6 | 20,322.4 |                      | 315.3    | 582.6    | 11                        | 66                    | 63    |
| 7              | A08                  | 15,275.0 | 15,916.9 | contig00008006       | 17.0     | 584.1    | 20                        | 110                   | 113   |
|                | A08                  | 19,265.7 | 19,459.0 |                      | 603.5    | 770.7    | 8                         | 39                    | 37    |
| 8              | A07                  | 21,403.1 | 21,916.8 | contig00133748       | 15.5     | 586.9    | 20                        | 91                    | 117   |
|                | A09                  | 12,363.9 | 17,725.1 |                      | 637.0    | 5,822.9  | 153                       | 695                   | 653   |



**Table S5. Abundance of transposable elements (TEs) identified in the genome of European turnip.**

| TE                                              | Searched length (Mb) | %       |
|-------------------------------------------------|----------------------|---------|
| <b>Class I elements</b>                         | 74,403,737           | (66.07) |
| LTR (subtotal)                                  | 55,743,062           | (49.50) |
| Ty3/Gypsy                                       | 33,187,081           | 29.47   |
| Ty1/Copia                                       | 21,075,761           | 18.71   |
| Cassandra                                       | 534,532              | 0.47    |
| Caulimovirus                                    | 110,190              | 0.10    |
| ERVK                                            | 104,868              | 0.09    |
| Pao                                             | 25,523               | 0.02    |
| Others/Unknown                                  | 705,107              | 0.63    |
| Non-LTR (subtotal)                              | 18,660,675           | (16.57) |
| LINE                                            | 16,252,136           | 14.43   |
| SINE                                            | 2,408,539            | 2.14    |
| <b>Class II elements</b>                        | 38,210,745           | (33.93) |
| DNA (subtotal)                                  | 38,210,745           | (33.93) |
| hAT family<br>(with Ac/Charlie/Tag1/Tip100)     | 13,158,681           | 11.68   |
| MULE-MuDR                                       | 6,365,507            | 5.65    |
| CMC-EnSpm                                       | 5,138,318            | 4.56    |
| PIF-Harbinger                                   | 4,752,496            | 4.22    |
| Helitron                                        | 4,547,650            | 4.04    |
| TcMar family<br>(with ariner/Pogo/Stowaway/Tc1) | 2,748,934            | 2.44    |
| Others/Unknown                                  | 1,499,159            | 1.33    |

**Table S6. Summary of RNA-Seq of different tissues of European turnip.**

| Samples                | Raw reads  | Clean reads (%)       | Mapped reads (%)      | Uniquely mapped reads (%) | Spliced reads (%)     |
|------------------------|------------|-----------------------|-----------------------|---------------------------|-----------------------|
| ECD4<br>inner leaf_1   | 53,575,142 | 52,580,078<br>(98.14) | 47,327,902<br>(88.34) | 45,613,520<br>(85.14)     | 18,465,410<br>(34.47) |
| ECD4<br>inner leaf_2   | 60,300,348 | 59,523,582<br>(98.71) | 54,193,196<br>(89.87) | 52,210,572<br>(86.58)     | 20,646,224<br>(34.24) |
| ECD4<br>outer leaf_1   | 54,416,502 | 52,970,948<br>(97.34) | 46,230,010<br>(84.96) | 44,583,200<br>(81.93)     | 16,679,664<br>(30.65) |
| ECD4<br>outer leaf_2   | 63,194,702 | 61,958,158<br>(98.04) | 55,507,212<br>(87.84) | 53,553,276<br>(84.74)     | 19,928,777<br>(31.54) |
| ECD4<br>outer leaf_3   | 57,775,686 | 55,980,324<br>(96.89) | 48,593,302<br>(84.11) | 46,930,456<br>(81.23)     | 17,995,378<br>(31.15) |
| ECD4<br>main root_1    | 55,676,998 | 53,707,262<br>(96.46) | 45,907,882<br>(82.45) | 44,208,654<br>(79.40)     | 15,232,827<br>(27.36) |
| ECD4<br>main root_2    | 56,979,834 | 55,943,520<br>(98.18) | 49,945,806<br>(87.66) | 48,163,920<br>(84.53)     | 16,709,783<br>(29.33) |
| ECD4<br>main root_3    | 58,162,354 | 56,707,134<br>(97.50) | 49,476,864<br>(85.07) | 47,692,428<br>(82.00)     | 16,172,743<br>(27.81) |
| ECD4<br>lateral root_1 | 60,672,526 | 58,771,946<br>(96.87) | 49,381,450<br>(81.39) | 47,685,294<br>(78.59)     | 15,795,713<br>(26.03) |
| ECD4<br>lateral root_3 | 74,434,806 | 72,847,398<br>(97.87) | 63,282,286<br>(85.02) | 61,160,122<br>(82.17)     | 19,825,123<br>(26.63) |

**Table S7. Identification of plant resistance *R* genes in the genome of European turnip.**

| Domains                            | ET  | CC  | YS  | Bo  | Bi  | Rs  | At  |
|------------------------------------|-----|-----|-----|-----|-----|-----|-----|
| <i>NBS-encoding R genes</i>        |     |     |     |     |     |     |     |
| CNL                                | 23  | 28  | 26  | 9   | 40  | 24  | 39  |
| CN                                 | 8   | 3   | 8   | 3   | 8   | 11  | 1   |
| TNL                                | 67  | 78  | 74  | 45  | 112 | 54  | 74  |
| TN                                 | 14  | 22  | 21  | 22  | 29  | 15  | 15  |
| NL                                 | 51  | 53  | 29  | 33  | 58  | 69  | 21  |
| NBS                                | 15  | 8   | 13  | 31  | 24  | 16  | 5   |
| TX                                 | 57  | 55  | 42  | 89  | 77  | 44  | 34  |
| Others                             | 17  | 17  | 11  | 8   | 24  | 21  | 15  |
| <i>Membrane-associated R genes</i> |     |     |     |     |     |     |     |
| RLP                                | 119 | 109 | 120 | 75  | 177 | 160 | 71  |
| RLK                                | 742 | 629 | 731 | 559 | 777 | 755 | 519 |
| TM-CC                              | 274 | 238 | 223 | 207 | 251 | 221 | 141 |

ET, European Turnip; CC, Chinese cabbage; YS, Yellow sarson, Bo, *B. oleracea*; Bi, *B. nigra*; Rs, *R. sativus*; At, *A. thaliana*

**Table S8. Mapping of microsatellite markers linked to clubroot resistance loci to the draft assembly of European turnip.**

| Microsatellite marker primer <sup>1</sup> | Linked marker                | Alignment of primer sequence to the assembly of ECD4 |                |           |                |           | Alignment of primer sequence to the genome of Chinese cabbage |                |            |                |            |
|-------------------------------------------|------------------------------|------------------------------------------------------|----------------|-----------|----------------|-----------|---------------------------------------------------------------|----------------|------------|----------------|------------|
|                                           |                              | #ECD4 contig                                         | Forward primer |           | Reverse primer |           | Chinese cabbage chromosome                                    | Forward primer |            | Reverse primer |            |
|                                           |                              |                                                      | Start (bp)     | End (bp)  | Start (bp)     | End (bp)  |                                                               | Start (bp)     | End (bp)   | Start (bp)     | End (bp)   |
| SASS45c                                   | proximal to <i>BraA.CR.a</i> | tig00007081                                          | 7,389,147      | 7,389,167 | 7,389,455      | 7,389,475 | A03                                                           | 25,405,695     | 25,405,715 | 25,405,391     | 25,405,411 |
| SASS45b                                   |                              | tig00007081                                          | 7,389,208      | 7,389,228 | 7,389,432      | 7,389,451 | A03                                                           | 25,405,634     | 25,405,654 | 25,405,415     | 25,405,434 |
| SASS79b                                   |                              | tig00007081                                          | 7,553,845      | 7,553,864 | 7,554,063      | 7,554,082 | A03                                                           | 25,203,690     | 25,203,709 | 25,203,402     | 25,203,421 |
| S33R33                                    | distant to <i>BraA.CR.b</i>  | tig00007150                                          | 2,598,625      | 2,598,642 | 2,598,359      | 2,598,377 | A08                                                           | 10,467,070     | 10,467,087 | 10,466,804     | 10,466,822 |
| S30R30                                    |                              | tig00007150                                          | 2,983,800      | 2,983,814 | 2,983,529      | 2,983,547 | A08                                                           | 10,800,075     | 10,800,093 | 10,799,804     | 10,799,822 |
| S23R23                                    |                              | tig00007150                                          | 3,534,116      | 3,534,135 | 3,533,823      | 3,533,841 | A08                                                           | 11,348,314     | 11,348,333 | 11,348,027     | 11,348,045 |
| S17R17                                    |                              | tig00007150                                          | 3,816,659      | 3,816,678 | 3,816,375      | 3,816,393 | A08                                                           | 11,625,330     | 11,625,349 | 11,625,042     | 11,625,060 |
| S14R14                                    | proximal to <i>BraA.CR.b</i> | tig00007150                                          | 4,125,571      | 4,125,589 | 4,125,281      | 4,125,299 | A08                                                           | 11,962,215     | 11,962,233 | 11,961,933     | 11,961,951 |
| S11R11                                    |                              | tig00007150                                          | 4,359,930      | 4,359,946 | 4,359,625      | 4,359,643 | A08                                                           | 12,241,864     | 12,241,883 | 12,241,559     | 12,241,577 |
| S08R08                                    |                              | tig00007150                                          | 4,544,186      | 4,544,205 | 4,543,910      | 4,543,928 | A08                                                           | 12,395,582     | 12,395,601 | 12,395,306     | 12,395,324 |
| S07R07                                    |                              | tig00007150                                          | 4,555,737      | 4,555,755 | 4,555,460      | 4,555,478 | A08                                                           | 12,407,122     | 12,407,140 | 12,406,841     | 12,406,859 |
| S06R06                                    |                              | tig00007150                                          | 4,590,418      | 4,590,436 | 4,590,143      | 4,590,161 | A08                                                           | 12,433,875     | 12,433,893 | 12,433,600     | 12,433,618 |

<sup>1</sup> Microsatellite markers reported by Hirani et al. (2018).

<sup>2</sup> (Con)tig00007081 and tig00007150 contain genomic regions spanning clubroot resistance loci *BraA.CR.a* and *BraA.CR.b*, respectively. Supplementary Figure 6 shows the comparison between tig00007081 and its counterpart in A03 (25.2 Mb ~ 25.4 Mb) and between tig00007150 and its counterpart in A08 (10.4 Mb ~ 11.6 Mb and 11.9 Mb ~ 12.4 Mb) of Chinese cabbage.

<sup>3</sup> Hirani, A. H., Gao, F., Liu, J., Fu, G., Wu, C., McVetty, P., Duncan, R. W., and Li, G. (2018). Combinations of Independent Dominant Loci Conferring Clubroot Resistance in All Four Turnip Accessions (*Brassica rapa*) From the European Clubroot Differential Set. *Frontiers in plant science*, 9, 1628. <https://doi.org/10.3389/fpls.2018.01628>.

**Table S9. List of *R* genes within conserved blocks that are linked to clubroot resistance loci.**

| Linked to <i>Cra/b</i> marker | Plant resistance <i>R</i> genes |                  |               |            |        |                                                        |                             |             |               |           |        |                                  |
|-------------------------------|---------------------------------|------------------|---------------|------------|--------|--------------------------------------------------------|-----------------------------|-------------|---------------|-----------|--------|----------------------------------|
|                               | Chinese cabbage                 |                  |               |            |        | Collinearity of genes between Chinese cabbage and ECD4 | ECD4                        |             |               |           |        |                                  |
|                               | Genomic regions (bp)            | Gene ID          | Position (bp) |            | Domain |                                                        | ECD4 Assembly (counterpart) | Gene ID     | Position (bp) |           | Domain | Note                             |
|                               |                                 |                  | Start         | End        |        |                                                        |                             |             | Start         | End       |        |                                  |
| Proximal to <i>BraA.CR.a</i>  | A03:<br>25,203,402 - 25,405,715 | BraA03g049600.3C | 25,213,983    | 25,217,814 | RLK    | Yes:<br>BraA03g049600.3C - GENE22552.1                 | tig00007081                 | GENE22552.1 | 7,488,865     | 7,491,493 | RLK    |                                  |
| Distant to <i>BraA.CR.b</i>   | A08:<br>10,466,804 - 11,625,349 |                  |               |            |        | No                                                     | tig00007150                 | GENE35902.1 | 3,430,277     | 3,433,000 | RLP    |                                  |
|                               |                                 | BraA08g012910.3C | 11,232,393    | 11,235,117 | RLP    | Yes:<br>BraA08g012910.3C - GENE35904.1                 |                             | GENE35904.1 | 3,445,195     | 3,447,572 | RLP    |                                  |
|                               |                                 | BraA08g012940.3C | 11,267,185    | 11,268,651 | RLK    | Yes:<br>BraA08g012940.3C - GENE35906.1                 |                             | GENE35906.1 | 3,456,500     | 3,457,966 | RLK    |                                  |
|                               |                                 | BraA08g012990.3C | 11,291,257    | 11,292,552 | RLP    | Yes:<br>BraA08g012990.3C - GENE35908.1                 |                             | GENE35908.1 | 3,473,295     | 3,475,298 | RLP    |                                  |
|                               |                                 |                  |               |            |        | No                                                     |                             | GENE35916.1 | 3,524,122     | 3,524,888 | TM-CC  |                                  |
|                               |                                 |                  |               |            |        | No                                                     |                             | GENE35952.1 | 3,730,220     | 3,739,922 | TNL    | <i>Rcr6</i> homolog <sup>1</sup> |
|                               |                                 |                  |               |            |        | No                                                     |                             | GENE35955.1 | 3,752,622     | 3,757,359 | TNL    | <i>Rcr6</i> homolog              |
| Proximal to <i>BraA.CR.b</i>  | A08:<br>11,961,933 - 12,433,893 | BraA08g014350.3C | 12,162,113    | 12,169,372 | RLK    | Yes:<br>BraA08g014350.3C - GENE36062.1                 | tig00007150                 | GENE36062.1 | 4,290,699     | 4,296,694 | RLK    |                                  |
|                               |                                 |                  |               |            |        | No                                                     |                             | GENE36077.1 | 4,366,191     | 4,367,740 | TM-CC  |                                  |
|                               |                                 | BraA08g014480.3C | 12,271,553    | 12,276,276 | TNL    | Yes:<br>BraA08g014480.3C - GENE36082.1                 |                             | GENE36082.1 | 4,399,833     | 4,403,361 | NL     | <i>Rcr6</i> homolog              |
|                               |                                 | BraA08g014530.3C | 12,326,397    | 12,329,524 | RLK    | Yes:<br>BraA08g014530.3C - GENE36087.1                 |                             | GENE36087.1 | 4,433,805     | 4,436,979 | RLK    |                                  |

<sup>1</sup> Homology to *Rcr6*: GENE35952.1 (BLASTP *E*-value: 4E-63), GENE35955.1 (3E-24), GENE36082.1 (0.0)

\* *Rcr6*: Chang, A., Lamara, M., Wei, Y. *et al.* (2019). Clubroot resistance gene *Rcr6* in *Brassica nigra* resides in a genomic region homologous to chromosome A08 in *B. rapa*. BMC Plant Biol. 19, 224. doi:10.1186/s12870-019-1844-5

**Table S10. BUSCO scores with multiple rounds of error correction in Pilon.**

| Type                            | 1 <sup>st</sup> round | 2 <sup>nd</sup> round | 3 <sup>rd</sup> round | 4 <sup>th</sup> round |
|---------------------------------|-----------------------|-----------------------|-----------------------|-----------------------|
| Complete BUSCOs                 | 423 (99.6%)           | 421 (99.0%)           | 421 (99.0%)           | 421 (99.0%)           |
| Complete and single-copy BUSCOs | 350 (82.4%)           | 344 (80.9%)           | 344 (80.9%)           | 344 (80.9%)           |
| Complete and duplicated BUSCOs  | 73 (17.2%)            | 77 (18.1%)            | 77 (18.1%)            | 77 (18.1%)            |
| Fragmented BUSCOs               | 1 (0.2%)              | 2 (0.5%)              | 2 (0.5%)              | 2 (0.5%)              |
| Missing BUSCOs                  | 1 (0.2%)              | 2 (0.5%)              | 2 (0.5%)              | 2 (0.5%)              |
